# Supplementary material for: Characterization of Trapped Lignin-Degrading Microbes in Tropical Forest Soil
Source: PubMed Central journal article supplement (PMC3084812; doi:10.1371/journal.pone.0019306), 2011-04-29
Supplement: pone.0019306.s007.pdf [file pone.0019306.s007.pdf]

Table S1. Enzyme activities measured on fresh beads.

|                                                                      | Lignin-amended<br>beads | Unamended<br>beads | p-value |
|----------------------------------------------------------------------|-------------------------|--------------------|---------|
| Phenol oxidase (mmol L-DOPA h <sup>-1</sup> g <sup>-1</sup> )        |                         |                    |         |
| T1 (1 week)                                                          | 1.449 +/- 0.227         | 1.189 +/- 0.125    | n.s.    |
| T2 (4 weeks)                                                         | 0.044 +/- 0.012         | 0.018 +/- 0.013    | n.s.    |
| T4 (30 weeks)                                                        | 0.375 +/- 0.08          | 0.118 +/- 0.033    | <0.05   |
| Peroxidase (mmol L-DOPA h <sup>-1</sup> g <sup>-1</sup> )            |                         |                    |         |
| T1 (1 week)                                                          | 0.139 +/- 0.021         | 0.085 +/- 0.012    | <0.05   |
| T2 (4 weeks)                                                         | 0.021 +/- 0.004         | 0.007 +/- 0.001    | <0.05   |
| T4 (30 weeks)                                                        | D                       | ND                 |         |
| b-Glucosidase (mmol MUB h <sup>-1</sup> g <sup>-1</sup> )            |                         |                    |         |
| T1 (1 week)                                                          | 96.11 +/- 7.9           | 116.11 +/- 2.06    | 0.05    |
| T2 (4 weeks)                                                         | 138.77 +/- 5.57         | 145.65 +/- 13.95   | n.s.    |
| T4 (30 weeks)                                                        | 316.37 +/- 28.78        | 381.8 +/- 56.51    | 0.05    |
| Cellobiohydrolase (mmol MUB h <sup>-1</sup> g <sup>-1</sup> )        |                         |                    |         |
| T1 (1 week)                                                          | 100.39 +/- 7.08         | 116.46 +/- 2.06    | n.s.    |
| T2 (4 weeks)                                                         | 152.84 +/- 9.66         | 155.05 +/- 15.15   | n.s.    |
| T4 (30 weeks)                                                        | 339.35 +/- 24.13        | 400.51 +/- 49.97   | n.s.    |
| N-acetyl glucosaminidase (mmol MUB h <sup>-1</sup> g <sup>-1</sup> ) |                         |                    |         |
| T1 (1 week)                                                          | 96.82 +/- 7.75          | 116.75 +/- 2.07    | <0.05   |
| T2 (4 weeks)                                                         | 110.41 +/- 16.9         | 110.38 +/- 19.59   | n.s.    |
| T4 (30 weeks)                                                        | 317.51 +/- 30.51        | 347.05 +/- 68.11   | <0.05   |
| Xylanase (mmol MUB h <sup>-1</sup> g <sup>-1</sup> )                 |                         |                    |         |
| T1 (1 week)                                                          | 97.17 +/- 7.63          | 116.29 +/- 2.06    | <0.05   |
| T2 (4 weeks)                                                         | 151.38 +/- 9.52         | 152.61 +/- 15.34   | n.s.    |
| T4 (30 weeks)                                                        | 331.61 +/- 24.18        | 396.18 +/- 50.51   | <0.05   |
