# Supplementary material for: Characterization of Trapped Lignin-Degrading Microbes in Tropical Forest Soil
Source: PubMed Central journal article supplement (PMC3084812; doi:10.1371/journal.pone.0019306), 2011-04-29
Supplement: pone.0019306.s009.pdf [file pone.0019306.s009.pdf]

Table S3. PhyloChip richness of taxa with significantly higher relative abundance in lignin-amended bug traps compared to unamended bug traps.

|                   | T1     |           | T2     |           | T3     |           | T4     |           |
|-------------------|--------|-----------|--------|-----------|--------|-----------|--------|-----------|
|                   | lignin | no lignin | lignin | no lignin | lignin | no lignin | lignin | no lignin |
| Proteobacteria    | 27     | 1         | 61     | 73        | 121    | 68        | 24     | 16        |
| Acidobacteria     | 34     | 10        | 57     | 53        | 75     | 52        | 24     | 19        |
| Actinobacteria    | 4      | 0         | 24     | 21        | 40     | 50        | 1      | 1         |
| Verrucomicrobia   | 12     | 5         | 17     | 15        | 14     | 12        | 10     | 10        |
| Unclassified      | 7      | 2         | 17     | 15        | 23     | 13        | 4      | 6         |
| Firmicutes        | 4      | 0         | 12     | 12        | 21     | 27        | 1      | 0         |
| Chloroflexi       | 2      | 0         | 10     | 11        | 18     | 17        | 0      | 1         |
| Synergistes       | 2      | 0         | 7      | 6         | 8      | 4         | 2      | 4         |
| SPAM              | 3      | 0         | 5      | 6         | 7      | 4         | 2      | 3         |
| Gemmatimonadetes  | 2      | 0         | 6      | 3         | 6      | 4         | 1      | 2         |
| OP10              | 1      | 0         | 4      | 5         | 6      | 3         | 1      | 1         |
| Lentisphaerae     | 1      | 0         | 3      | 4         | 6      | 4         | 0      | 0         |
| BRC1              | 1      | 0         | 2      | 3         | 4      | 2         | 1      | 0         |
| NC10              | 1      | 0         | 2      | 2         | 4      | 2         | 0      | 0         |
| Bacteroidetes     | 0      | 0         | 1      | 2         | 3      | 2         | 0      | 0         |
| Natronoanaerobium | 0      | 0         | 2      | 0         | 2      | 2         | 0      | 0         |
| OP9/JS1           | 0      | 0         | 1      | 2         | 1      | 2         | 0      | 0         |
| Caldithrix        | 0      | 0         | 0      | 1         | 2      | 1         | 0      | 0         |
| Chlorobi          | 0      | 0         | 0      | 1         | 0      | 1         | 0      | 0         |
