# Supplementary material for: Characterization of Trapped Lignin-Degrading Microbes in Tropical Forest Soil
Source: PubMed Central journal article supplement (PMC3084812; doi:10.1371/journal.pone.0019306), 2011-04-29
Supplement: pone.0019306.s010.pdf [file pone.0019306.s010.pdf]

Table S4. Phylogenetic classification at the phylum level of bacterial taxa identified by SSU rRNA amplicon pyrosequencing. Values indicate “**richness**” (number of unique taxa detected for each phylum) given as percentage. Phyla contributing  $\geq 7.5\%$  are in **bold**, and  $\geq$  are also underlined. Average values are from n=4 beads. n.d. = not detected.

|                       | T1                               |                                  | T2            |               | T3            |               | T4            |               |
|-----------------------|----------------------------------|----------------------------------|---------------|---------------|---------------|---------------|---------------|---------------|
|                       | no lignin                        | lignin                           | no lignin     | lignin        | no lignin     | lignin        | no lignin     | lignin        |
| Archaea               | 0.2 $\pm$ 0.3                    | 0.2 $\pm$ 0.4                    | 0.1 $\pm$ 0.2 | 0.1 $\pm$ 0.3 | 0.2 $\pm$ 0.3 | 0.1 $\pm$ 0.1 | 0.3 $\pm$ 0.1 | 0.6 $\pm$ 0.3 |
| ABY1 OD1              | n.d.                             | n.d.                             | n.d.          | n.d.          | 0.1 $\pm$ 0.1 | 0.1 $\pm$ 0.2 | 0.1 $\pm$ 0.1 | 0.2 $\pm$ 0.3 |
| <u>Acidobacteria</u>  | <u>8.6 <math>\pm</math> 2.1</u>  | <u>7.6 <math>\pm</math> 1.3</u>  | 4.7 $\pm$ 2.0 | 5.0 $\pm$ 3.7 | 5.6 $\pm$ 1.6 | 7.5 $\pm$ 2.5 | 5.6 $\pm$ 1.7 | 8.5 $\pm$ 0.9 |
| <u>Actinobacteria</u> | <u>11.7 <math>\pm</math> 2.5</u> | <u>12.9 <math>\pm</math> 1.7</u> | 7.9 $\pm$ 2.3 | 8.0 $\pm$ 1.3 | 8.1 $\pm$ 0.9 | 8.9 $\pm$ 2.2 | 6.7 $\pm$ 1.3 | 9.4 $\pm$ 1.4 |
| AD3                   | 0.1 $\pm$ 0.2                    | 0.5 $\pm$ 0.2                    | 0.1 $\pm$ 0.1 | 0.1 $\pm$ 0.1 | 0.1 $\pm$ 0.1 | 0.2 $\pm$ 0.2 | 0.1 $\pm$ 0.2 | 0.3 $\pm$ 0.2 |
| Bacteroidetes         | 6.1 $\pm$ 4.5                    | 3.9 $\pm$ 1.5                    | 8.0 $\pm$ 4.1 | 6.4 $\pm$ 2.0 | 4.7 $\pm$ 0.6 | 6.3 $\pm$ 0.7 | 4.7 $\pm$ 1.1 | 4.4 $\pm$ 0.3 |
| BRC1                  | n.d.                             | n.d.                             | 0.2 $\pm$ 0.4 | n.d.          | n.d.          | 0.2 $\pm$ 0.1 | 0.2 $\pm$ 0.2 | 0.1 $\pm$ 0.3 |
| Caldithrix            | n.d.                             | n.d.                             | n.d.          | n.d.          | n.d.          | 0.1 $\pm$ 0.1 | n.d.          | 0.0 $\pm$ 0.1 |
| Chlamydiae            | 1.2 $\pm$ 0.7                    | 1.7 $\pm$ 0.9                    | 0.9 $\pm$ 1.0 | 3.1 $\pm$ 1.9 | 3.7 $\pm$ 1.1 | 2.1 $\pm$ 1.1 | 5.0 $\pm$ 2.4 | 2.9 $\pm$ 1.1 |
| Chlorobi              | 0.0                              | 0.1 $\pm$ 0.1                    | 0.4 $\pm$ 0.7 | 0.3 $\pm$ 0.3 | 0.4 $\pm$ 0.3 | 0.6 $\pm$ 0.3 | 0.2 $\pm$ 0.0 | 0.5 $\pm$ 0.1 |
| <u>Chloroflexi</u>    | 9.5 $\pm$ 1.2                    | <u>14.4 <math>\pm</math> 1.5</u> | 3.9 $\pm$ 3.5 | 4.9 $\pm$ 1.8 | 5.6 $\pm$ 1.7 | 7.7 $\pm$ 1.9 | 4.7 $\pm$ 3.0 | 9.7 $\pm$ 1.4 |
| CV51                  | n.d.                             | n.d.                             | n.d.          | n.d.          | n.d.          | n.d.          | 0.1 $\pm$ 0.1 | 0.1 $\pm$ 0.1 |
| Cyanobacteria         | 0.4 $\pm$ 0.3                    | 0.3 $\pm$ 0.2                    | 0.0 $\pm$ 0.1 | 0.5 $\pm$ 0.5 | 0.7 $\pm$ 0.4 | 0.5 $\pm$ 0.4 | 0.9 $\pm$ 0.2 | 0.3 $\pm$ 0.3 |
| Desulfitobacter       | n.d.                             | n.d.                             | n.d.          | n.d.          | n.d.          | n.d.          | 0.0 $\pm$ 0.1 | n.d.          |
| Elev_16S_998          | n.d.                             | n.d.                             | n.d.          | n.d.          | n.d.          | n.d.          | n.d.          | 0.1 $\pm$ 0.1 |
| Elusimicrobia         | 0.2 $\pm$ 0.3                    | 0.2 $\pm$ 0.2                    | 0.1 $\pm$ 0.1 | 0.3 $\pm$ 0.5 | 0.2 $\pm$ 0.4 | 0.5 $\pm$ 0.5 | 0.4 $\pm$ 0.3 | 0.8 $\pm$ 0.3 |
| Entotheonella         | 0.2 $\pm$ 0.2                    | 0.2 $\pm$ 0.2                    | 0.1 $\pm$ 0.3 | 0.1 $\pm$ 0.1 | 0.1 $\pm$ 0.1 | 0.1 $\pm$ 0.1 | 0.1 $\pm$ 0.1 | 0.1 $\pm$ 0.0 |
| FCPS706               | 0.2 $\pm$ 0.2                    | 0.2 $\pm$ 0.1                    | 0.1 $\pm$ 0.1 | 0.2 $\pm$ 0.2 | 0.1 $\pm$ 0.1 | 0.1 $\pm$ 0.1 | 0.1 $\pm$ 0.1 | 0.1 $\pm$ 0.0 |
| Fibrobacteres         | n.d.                             | n.d.                             | n.d.          | n.d.          | n.d.          | 0.1 $\pm$ 0.1 | n.d.          | n.d.          |
| Firmicutes            | 6.4 $\pm$ 1.6                    | 8.5 $\pm$ 1.1                    | 3.7 $\pm$ 2.4 | 3.6 $\pm$ 1.5 | 3.5 $\pm$ 1.1 | 3.5 $\pm$ 1.0 | 3.3 $\pm$ 1.0 | 4.0 $\pm$ 4.0 |
| GAL15                 | 0.3 $\pm$ 0.3                    | 0.4 $\pm$ 0.2                    | 0.1 $\pm$ 0.2 | 0.1 $\pm$ 0.1 | 0.2 $\pm$ 0.1 | 0.1 $\pm$ 0.0 | 0.2 $\pm$ 0.2 | 0.1 $\pm$ 0.1 |
| Gemmatimonadetes      | 0.9 $\pm$ 0.5                    | 0.7 $\pm$ 0.2                    | 0.8 $\pm$ 0.6 | 1.0 $\pm$ 0.9 | 1.9 $\pm$ 0.4 | 1.7 $\pm$ 0.3 | 1.6 $\pm$ 0.7 | 1.6 $\pm$ 0.4 |
| GN02                  | n.d.                             | n.d.                             | n.d.          | 0.1 $\pm$ 0.1 | n.d.          | 0.1 $\pm$ 0.1 | 0.0 $\pm$ 0.1 | 0.0 $\pm$ 0.1 |
| Lentisphaerae         | n.d.                             | n.d.                             | n.d.          | n.d.          | n.d.          | n.d.          | 0.0 $\pm$ 0.1 | n.d.          |
| Marine group A        | n.d.                             | n.d.                             | n.d.          | n.d.          | n.d.          | 0.0 $\pm$ 0.1 | n.d.          | n.d.          |

| Table S4, cont'd           | T1               |                  | T2               |                  | T3               |                  | T4               |                  |
|----------------------------|------------------|------------------|------------------|------------------|------------------|------------------|------------------|------------------|
|                            | no lignin        | lignin           | no lignin        | lignin           | no lignin        | lignin           | no lignin        | lignin           |
| MBMPE71                    | n.d.             | n.d.             | n.d.             | n.d.             | n.d.             | 0.0 ±0.1         | n.d.             | n.d.             |
| NC10                       | 0.1 ±0.2         | 0.3 ±0.1         | n.d.             | 0.1 ±0.1         | 0.1 ±0.1         | 0.1 ±0.1         | 0.1 ±0.2         | 0.2 ±0.1         |
| Nitrospirae                | 0.1 ±0.2         | 0.4 ±0.6         | 0.2 ±0.3         | 0.3 ±0.5         | 0.4 ±0.3         | 0.9 ±0.7         | 0.3 ±0.3         | 1.2 ±0.4         |
| NKB19                      | n.d.             | n.d.             | n.d.             | n.d.             | n.d.             | 0.1 ±0.1         | 0.0 ±0.1         | 0.0 ±0.1         |
| O1aA90                     | n.d.             | n.d.             | n.d.             | n.d.             | n.d.             | n.d.             | n.d.             | 0.1 ±0.1         |
| O339                       | 0.1 ±0.2         | n.d.             | n.d.             | n.d.             | n.d.             | n.d.             | 0.0 ±0.1         | n.d.             |
| OP3                        | n.d.             | n.d.             | n.d.             | n.d.             | 0.0 ±0.1         | n.d.             | 0.0 ±0.1         | 0.0 ±0.1         |
| OP5                        | n.d.             | n.d.             | n.d.             | n.d.             | n.d.             | 0.0 ±0.1         | 0.0 ±0.1         | 0.1 ±0.1         |
| OP10                       | 0.5 ±1.1         | 0.4 ±0.1         | 0.1 ±0.1         | 0.7 ±0.7         | 0.2 ±0.2         | 0.9 ±0.7         | 0.2 ±0.2         | 0.7 ±0.2         |
| OP11                       | n.d.             | 0.1 ±0.1         | n.d.             | 0.2 ±0.3         | 0.3 ±0.4         | 0.6 ±0.4         | 0.3 ±0.4         | 1.6 ±0.7         |
| Planctomycetes             | 5.4 ±1.0         | 5.3 ±2.2         | 4.2 ±3.3         | 5.4 ±0.9         | 9.9 ±1.0         | 8.6 ±0.2         | 8.3 ±1.6         | 9.5 ±1.7         |
| <u>Alphaproteobacteria</u> | <u>16.2 ±2.9</u> | <u>14.2 ±0.7</u> | <u>25.0 ±8.1</u> | <u>20.5 ±3.3</u> | <u>14.9 ±4.0</u> | <u>13.7 ±3.0</u> | <u>13.3 ±0.7</u> | <u>11.1 ±0.9</u> |
| Betaproteobacteria         | 7.1 ±2.1         | 6.2 ±1.9         | 9.2 ±1.6         | 7.2 ±1.9         | 4.3 ±2.2         | 5.4 ±1.8         | 4.4 ±0.5         | 4.2 ±0.5         |
| Gammaproteobacteria        | 6.0 ±1.4         | 4.9 ±1.4         | 8.6 ±2.9         | 6.8 ±2.8         | 8.0 ±1.7         | 5.2 ±1.0         | 9.2 ±3.7         | 6.1 ±1.2         |
| Deltaproteobacteria        | 4.1 ±1.0         | 3.8 ±1.3         | 4.9 ±2.0         | 4.5 ±1.2         | 5.5 ±1.6         | 7.8 ±0.9         | 5.2 ±1.9         | 6.9 ±1.0         |
| Epsilonproteobacteria      | n.d.             | n.d.             | n.d.             | n.d.             | n.d.             | 0.0 ±0.1         | n.d.             | 0.0 ±0.1         |
| SC3                        | n.d.             | 0.1 ±0.2         | n.d.             | 0.2 ±0.3         | 0.1 ±0.1         | 0.1 ±0.1         | 0.1 ±0.1         | 0.3 ±0.2         |
| SC4                        | n.d.             | n.d.             | n.d.             | n.d.             | 0.0 ±0.1         | 0.1 ±0.1         | n.d.             | 0.0 ±0.1         |
| SHA-95                     | n.d.             | n.d.             | n.d.             | n.d.             | n.d.             | n.d.             | 0.0 ±0.1         | 0.0 ±0.1         |
| SM2F11                     | n.d.             | n.d.             | n.d.             | 0.2 ±0.2         | 0.0 ±0.1         | 0.1 ±0.2         | 0.1 ±0.2         | 0.2 ±0.1         |
| SPAM                       | 0.5 ±0.3         | 0.8 ±0.2         | 0.3 ±0.2         | 0.4 ±0.5         | 0.4 ±0.1         | 0.6 ±0.3         | 0.2 ±0.1         | 0.7 ±0.1         |
| Spirochaetes               | 0.2 ±0.2         | 0.0 ±0.1         | 0.4 ±0.3         | 0.5 ±0.5         | 0.1 ±0.1         | 0.3 ±0.1         | 0.4 ±0.3         | 0.2 ±0.2         |
| SR1                        | n.d.             | n.d.             | n.d.             | 0.1 ±0.1         | n.d.             | n.d.             | n.d.             | n.d.             |
| Synergistetes              | n.d.             | n.d.             | n.d.             | n.d.             | n.d.             | n.d.             | 0.0 ±0.1         | n.d.             |
| Thermi                     | 0.4 ±0.2         | 0.2 ±0.2         | 0.1 ±0.1         | n.d.             | 0.1 ±0.1         | 0.1 ±0.1         | n.d.             | n.d.             |
| Thermotogae                | n.d.             | n.d.             | n.d.             | n.d.             | 0.0 ±0.1         | n.d.             | n.d.             | n.d.             |
| TM6                        | 0.9 ±0.6         | 0.6 ±0.3         | 0.6 ±0.7         | 1.0 ±1.0         | 2.7 ±0.6         | 1.1 ±0.6         | 2.9 ±2.0         | 1.5 ±0.3         |
| TM7                        | 0.1 ±0.3         | 0.2 ±0.4         | 0.3 ±0.3         | 1.2 ±0.6         | 0.6 ±0.2         | 0.4 ±0.3         | 0.4 ±0.3         | 0.3 ±0.3         |
| Verrucomicrobia            | 2.3 ±0.6         | 1.9 ±0.2         | 2.5 ±1.0         | 2.7 ±1.5         | 2.0 ±0.4         | 3.2 ±1.3         | 2.2 ±0.7         | 3.3 ±0.4         |
| VHS-B5-50                  | n.d.             | 0.1 ±0.1         | n.d.             | n.d.             | 0.1 ±0.1         | n.d.             | n.d.             | n.d.             |

| Table S4, cont'd | T1        |          | T2        |          | T3        |          | T4               |          |
|------------------|-----------|----------|-----------|----------|-----------|----------|------------------|----------|
|                  | no lignin | lignin   | no lignin | lignin   | no lignin | lignin   | no lignin        | lignin   |
| WCHB1-27         | n.d.      | n.d.     | n.d.      | 0.1 ±0.1 | n.d.      | n.d.     | n.d.             | 0.1 ±0.1 |
| WPS-2            | 0.4 ±0.1  | 0.4 ±0.1 | 0.1 ±0.3  | 0.1 ±0.3 | 0.1 ±0.1  | 0.2 ±0.2 | 0.1 ±0.1         | 0.3 ±0.2 |
| WS3              | n.d.      | 0.2 ±0.2 | n.d.      | 0.2 ±0.2 | 0.1 ±0.1  | 0.3 ±0.3 | 0.0 ±0.1         | 0.2 ±0.1 |
| WS5              | n.d.      | n.d.     | n.d.      | n.d.     | n.d.      | 0.0 ±0.1 | n.d.             | 0.0 ±0.1 |
| WS6              | n.d.      | n.d.     | n.d.      | n.d.     | n.d.      | 0.1 ±0.1 | n.d.             | n.d.     |
| ZB2              | n.d.      | n.d.     | n.d.      | 0.2 ±0.3 | 0.3 ±0.3  | 0.2 ±0.2 | 0.7 ±0.6         | 0.4 ±0.6 |
| ZB3              | n.d.      | n.d.     | n.d.      | n.d.     | n.d.      | n.d.     | 0.0 ±0.1         | n.d.     |
| Fungi            | 3.0 ±1.2  | 2.2 ±0.8 | 2.7 ±1.7  | 3.9 ±2.0 | 4.0 ±0.8  | 2.1 ±0.7 | 5.5 ±2.0         | 2.0 ±0.8 |
| <u>Eukaryota</u> | 4.3 ±1.9  | 5.1 ±2.7 | 7.0 ±4.8  | 8.2 ±1.5 | 9.3 ±2.1  | 6.3 ±4.3 | <u>10.2 ±2.8</u> | 4.2 ±1.1 |
| Chloroplasts     | 0.1 ±0.1  | n.d.     | 0.0 ±0.1  | n.d.     | 0.1 ±0.1  | 0.1 ±0.1 | 0.0 ±0.1         | 0.0 ±0.1 |
| Unclassified     | 2.1 ±0.5  | 0.9 ±0.4 | 2.6 ±1.1  | 2.0 ±0.9 | 1.0 ±0.4  | 0.6 ±0.4 | 1.1 ±0.3         | 0.5 ±0.1 |
