# Supplementary material for: Characterization of Trapped Lignin-Degrading Microbes in Tropical Forest Soil
Source: PubMed Central journal article supplement (PMC3084812; doi:10.1371/journal.pone.0019306), 2011-04-29
Supplement: pone.0019306.s011.pdf [file pone.0019306.s011.pdf]

Table S5. Phylogenetic classification of identified SSU rRNA sequence tags (pyrosequencing) based on phylum level. Values indicate “**evenness**” (number of sequence tags identified for each phylum) given as percentage. Phyla contributing  $\geq 10\%$  are in bold. Average values are from n=4 beads. n.d. = not detected.

|                            | T1                              |                                  | T2                               |                                  | T3                               |                                 | T4                              |                                 |
|----------------------------|---------------------------------|----------------------------------|----------------------------------|----------------------------------|----------------------------------|---------------------------------|---------------------------------|---------------------------------|
|                            | no lignin                       | lignin                           | no lignin                        | lignin                           | no lignin                        | lignin                          | no lignin                       | lignin                          |
| Archaea                    | n.d.                            | 0.1 $\pm$ 0.1                    | n.d.                             | n.d.                             | 0.0 $\pm$ 0.1                    | 0.0 $\pm$ 0.1                   | 0.1 $\pm$ 0.0                   | 0.5 $\pm$ 0.3                   |
| ABY1 OD1                   | n.d.                            | n.d.                             | n.d.                             | n.d.                             | n.d.                             | n.d.                            | 0.1 $\pm$ 0.1                   | 0.1 $\pm$ 0.1                   |
| <u>Acidobacteria</u>       | 2.6 $\pm$ 1.7                   | 4.3 $\pm$ 3.0                    | 0.8 $\pm$ 0.4                    | 2.5 $\pm$ 2.8                    | 3.1 $\pm$ 3.0                    | 6.2 $\pm$ 3.7                   | 3.5 $\pm$ 2.8                   | <b>10.6 <math>\pm</math>1.1</b> |
| <u>Actinobacteria</u>      | 5.7 $\pm$ 4.5                   | <b>10.6 <math>\pm</math>6.5</b>  | 3.3 $\pm$ 1.6                    | 6.0 $\pm$ 1.9                    | 5.5 $\pm$ 2.1                    | 7.8 $\pm$ 3.2                   | 6.1 $\pm$ 3.4                   | <b>10.4 <math>\pm</math>2.5</b> |
| AD3                        | n.d.                            | 0.1 $\pm$ 0.1                    | n.d.                             | n.d.                             | n.d.                             | 0.1 $\pm$ 0.0                   | n.d.                            | 0.1 $\pm$ 0.1                   |
| Bacteroidetes              | 2.3 $\pm$ 2.3                   | 2.2 $\pm$ 1.8                    | 5.3 $\pm$ 4.9                    | 3.6 $\pm$ 2.1                    | 4.0 $\pm$ 0.8                    | 4.4 $\pm$ 2.7                   | 4.3 $\pm$ 2.1                   | 2.6 $\pm$ 0.6                   |
| BRC1                       | n.d.                            | n.d.                             | 0.0 $\pm$ 0.1                    | n.d.                             | n.d.                             | 0.1 $\pm$ 0.1                   | 0.0 $\pm$ 0.1                   | 0.0 $\pm$ 0.1                   |
| Caldithrix                 | n.d.                            | n.d.                             | n.d.                             | n.d.                             | n.d.                             | 0.0 $\pm$ 0.1                   | n.d.                            | n.d.                            |
| Chlamydiae                 | 0.1 $\pm$ 0.0                   | 0.3 $\pm$ 0.2                    | 0.1 $\pm$ 0.2                    | 1.0 $\pm$ 0.8                    | 4.5 $\pm$ 1.8                    | 0.8 $\pm$ 0.5                   | 7.2 $\pm$ 6.9                   | 1.7 $\pm$ 1.2                   |
| Chlorobi                   | n.d.                            | n.d.                             | 1.5 $\pm$ 1.8                    | 0.1 $\pm$ 0.1                    | 0.1 $\pm$ 0.1                    | 0.6 $\pm$ 0.8                   | 0.1 $\pm$ 0.1                   | 0.2 $\pm$ 0.1                   |
| Chloroflexi                | 1.3 $\pm$ 0.5                   | 6.4 $\pm$ 4.8                    | 0.4 $\pm$ 0.3                    | 1.7 $\pm$ 1.7                    | 2.3 $\pm$ 2.6                    | 5.0 $\pm$ 3.0                   | 2.5 $\pm$ 2.3                   | 8.8 $\pm$ 2.8                   |
| Cyanobacteria              | n.d.                            | n.d.                             | n.d.                             | 0.1 $\pm$ 0.1                    | 0.4 $\pm$ 0.2                    | 0.2 $\pm$ 0.2                   | 0.5 $\pm$ 0.3                   | 0.1 $\pm$ 0.1                   |
| Elusimicrobia              | n.d.                            | n.d.                             | n.d.                             | 0.2 $\pm$ 0.3                    | 0.0 $\pm$ 0.1                    | 0.2 $\pm$ 0.3                   | 0.1 $\pm$ 0.1                   | 0.3 $\pm$ 0.2                   |
| Entotheonella              | n.d.                            | 0.1 $\pm$ 0.1                    | 0.0 $\pm$ 0.1                    | 0.1 $\pm$ 0.1                    | n.d.                             | 0.1 $\pm$ 0.1                   | n.d.                            | 0.1 $\pm$ 0.0                   |
| FCPS706                    | n.d.                            | 0.1 $\pm$ 0.1                    | n.d.                             | n.d.                             | n.d.                             | n.d.                            | n.d.                            | 0.1 $\pm$ 0.0                   |
| Firmicutes                 | 7.0 $\pm$ 7.8                   | 4.2 $\pm$ 3.4                    | 1.2 $\pm$ 1.3                    | 1.7 $\pm$ 1.6                    | 1.0 $\pm$ 0.6                    | 1.7 $\pm$ 0.3                   | 1.4 $\pm$ 0.8                   | 1.8 $\pm$ 0.3                   |
| GAL15                      | 0.1 $\pm$ 0.1                   | 0.3 $\pm$ 0.3                    | n.d.                             | 0.1 $\pm$ 0.1                    | 0.1 $\pm$ 0.1                    | 0.1 $\pm$ 0.1                   | 0.1 $\pm$ 0.1                   | 0.1 $\pm$ 0.1                   |
| Gemmatimonadetes           | 0.2 $\pm$ 0.1                   | 0.1 $\pm$ 0.1                    | 0.2 $\pm$ 0.1                    | 0.3 $\pm$ 0.3                    | 0.9 $\pm$ 0.3                    | 0.8 $\pm$ 0.3                   | 1.3 $\pm$ 0.8                   | 0.7 $\pm$ 0.3                   |
| GN02                       | n.d.                            | n.d.                             | n.d.                             | n.d.                             | n.d.                             | 0.0 $\pm$ 0.1                   | n.d.                            | n.d.                            |
| NC10                       | n.d.                            | 0.1 $\pm$ 0.1                    | n.d.                             | n.d.                             | 0.0 $\pm$ 0.1                    | 0.2 $\pm$ 0.1                   | n.d.                            | 0.5 $\pm$ 0.4                   |
| Nitrospirae                | n.d.                            | 0.2 $\pm$ 0.3                    | 0.0 $\pm$ 0.1                    | 0.2 $\pm$ 0.2                    | 0.1 $\pm$ 0.1                    | 0.3 $\pm$ 0.2                   | 0.1 $\pm$ 0.1                   | 0.7 $\pm$ 0.2                   |
| OP10                       | 0.1 $\pm$ 0.1                   | 0.1 $\pm$ 0.0                    | n.d.                             | 0.2 $\pm$ 0.2                    | 0.0 $\pm$ 0.1                    | 0.4 $\pm$ 0.2                   | 0.1 $\pm$ 0.1                   | 0.2 $\pm$ 0.1                   |
| OP11                       | n.d.                            | n.d.                             | n.d.                             | n.d.                             | 0.0 $\pm$ 0.1                    | 0.3 $\pm$ 0.3                   | 0.1 $\pm$ 0.1                   | 0.6 $\pm$ 0.3                   |
| Planctomycetes             | 0.8 $\pm$ 0.3                   | 1.4 $\pm$ 1.1                    | 1.2 $\pm$ 1.0                    | 1.2 $\pm$ 0.6                    | 4.0 $\pm$ 0.7                    | 2.8 $\pm$ 0.6                   | 4.7 $\pm$ 0.4                   | 4.8 $\pm$ 0.8                   |
| <u>Alphaproteobacteria</u> | <b>13.2 <math>\pm</math>7.5</b> | <b>12.4 <math>\pm</math>8.3</b>  | <b>29.8 <math>\pm</math>11.1</b> | <b>22.9 <math>\pm</math>11.0</b> | <b>40.2 <math>\pm</math>16.8</b> | <b>26.0 <math>\pm</math>9.5</b> | <b>34.5 <math>\pm</math>4.0</b> | <b>26.1 <math>\pm</math>3.9</b> |
| <u>Betaproteobacteria</u>  | <b>38.4 <math>\pm</math>6.2</b> | <b>36.6 <math>\pm</math>19.4</b> | <b>28.1 <math>\pm</math>6.7</b>  | <b>36.9 <math>\pm</math>13.9</b> | <b>13.7 <math>\pm</math>8.5</b>  | <b>21.0 <math>\pm</math>7.6</b> | 7.5 $\pm$ 3.2                   | <b>10.7 <math>\pm</math>1.9</b> |

| Table S5, cont'd           | T1         |            | T2        |          | T3        |          | T4        |          |
|----------------------------|------------|------------|-----------|----------|-----------|----------|-----------|----------|
|                            | no lignin  | lignin     | no lignin | lignin   | no lignin | lignin   | no lignin | lignin   |
| <u>Gammaproteobacteria</u> | 18.3 ±18.6 | 14.2 ±11.4 | 8.4 ±6.6  | 5.5 ±3.0 | 4.6 ±1.1  | 3.2 ±1.6 | 6.4 ±2.1  | 4.1 ±1.4 |
| Deltaproteobacteria        | 0.7 ±0.6   | 1.1 ±0.8   | 1.7 ±1.7  | 2.6 ±1.6 | 2.0 ±1.1  | 5.8 ±3.2 | 2.4 ±1.7  | 5.1 ±2.1 |
| SC3                        | n.d.       | n.d.       | n.d.      | 0.1 ±0.1 | n.d.      | n.d.     | n.d.      | 0.1 ±0.1 |
| SM2F11                     | n.d.       | n.d.       | n.d.      | n.d.     | n.d.      | 0.1 ±0.1 | 0.0 ±0.1  | 0.1 ±0.0 |
| SPAM                       | 0.1 ±0.1   | 0.2 ±0.1   | n.d.      | 0.1 ±0.2 | 0.2 ±0.2  | 0.4 ±0.3 | 0.1 ±0.0  | 0.8 ±0.2 |
| Spirochaetes               | n.d.       | n.d.       | 0.1 ±0.1  | 0.1 ±0.1 | 0.1 ±0.1  | 0.1 ±0.0 | 0.1 ±0.0  | 0.1 ±0.1 |
| SR1                        | n.d.       | n.d.       | n.d.      | 0.0 ±0.1 | n.d.      | n.d.     | n.d.      | n.d.     |
| Thermi                     | 0.2 ±0.3   | 0.1 ±0.1   | n.d.      | n.d.     | n.d.      | n.d.     | n.d.      | n.d.     |
| TM6                        | 0.1 ±0.1   | 0.1 ±0.1   | 1.0 ±2.0  | 0.3 ±0.2 | 1.4 ±1.1  | 0.4 ±0.3 | 2.0 ±1.9  | 0.6 ±0.3 |
| TM7                        | n.d.       | 0.1 ±0.1   | 0.1 ±0.1  | 0.3 ±0.1 | 0.1 ±0.0  | 0.1 ±0.1 | 0.1 ±0.1  | 0.1 ±0.1 |
| Verrucomicrobia            | 0.6 ±0.4   | 0.6 ±0.4   | 0.6 ±0.3  | 1.0 ±1.0 | 0.8 ±0.6  | 1.7 ±0.8 | 1.7 ±0.6  | 2.7 ±0.2 |
| WCHB1-27                   | n.d.       | n.d.       | n.d.      | n.d.     | n.d.      | n.d.     | n.d.      | 0.1 ±0.0 |
| WPS-2                      | 0.1 ±0.1   | 0.1 ±0.0   | n.d.      | n.d.     | n.d.      | 0.1 ±0.0 | n.d.      | 0.1 ±0.1 |
| WS3                        | n.d.       | n.d.       | n.d.      | n.d.     | 0.0 ±0.1  | 0.1 ±0.1 | n.d.      | 0.1 ±0.1 |
| ZB2                        | n.d.       | n.d.       | n.d.      | n.d.     | 0.0 ±0.1  | 0.2 ±0.1 | 0.4 ±0.4  | 0.2 ±0.3 |
| Fungi                      | 5.8 ±10.4  | 0.7 ±0.4   | 3.0 ±2.4  | 3.7 ±4.0 | 5.3 ±4.3  | 1.6 ±1.2 | 3.6 ±0.9  | 1.4 ±0.9 |
| Alveolata                  | 0.3 ±0.2   | 0.6 ±0.1   | 3.4 ±3.9  | 0.6 ±0.8 | 0.4 ±0.2  | 2.5 ±3.8 | 1.3 ±0.7  | 0.3 ±0.2 |
| Cercozoa                   | 0.3 ±0.1   | 0.5 ±0.7   | 2.8 ±2.8  | 3.0 ±2.9 | 1.3 ±0.4  | 2.5 ±2.9 | 2.2 ±0.8  | 0.8 ±0.8 |
| Euglenozoa                 | 0.1 ±0.1   | 1.2 ±2.0   | 0.2 ±0.2  | 0.5 ±0.9 | 0.2 ±0.1  | 0.1 ±0.1 | 0.7 ±1.2  | 0.1 ±0.2 |
| Heterolobosea              | n.d.       | n.d.       | 0.7 ±1.3  | 0.3 ±0.3 | 0.3 ±0.2  | 0.0 ±0.1 | 0.3 ±0.3  | 0.1 ±0.1 |
| Eukaryota (others)         | 0.6 ±0.6   | 0.4 ±0.4   | 1.0 ±0.7  | 1.9 ±0.9 | 1.8 ±0.6  | 1.2 ±0.9 | 3.4 ±1.9  | 1.1 ±0.5 |
| Chloroplasts               | n.d.       | n.d.       | n.d.      | n.d.     | n.d.      | n.d.     | 0.0 ±0.1  | n.d.     |
| Unclassified               | 0.7 ±0.4   | 0.4 ±0.4   | 4.6 ±3.2  | 1.0 ±0.5 | 1.1 ±0.5  | 0.6 ±0.8 | 0.6 ±0.3  | 0.4 ±0.1 |
