# Supplementary material for: Characterization of Trapped Lignin-Degrading Microbes in Tropical Forest Soil
Source: PubMed Central journal article supplement (PMC3084812; doi:10.1371/journal.pone.0019306), 2011-04-29
Supplement: pone.0019306.s012.pdf [file pone.0019306.s012.pdf]

Table S6. Taxonomy and nearest neighbor of 38 taxa significantly enriched on lignin beads by PhyloChip.

| Phylum          | Class               | Order               | Family                        | OTU_ID | GenBank ID |
|-----------------|---------------------|---------------------|-------------------------------|--------|------------|
| Acidobacteria   | Acidobacteria       | Acidobacteriales    | Acidobacteriaceae             | 6345   | AJ534634.1 |
| Acidobacteria   | Acidobacteria       | Acidobacteriales    | Acidobacteriaceae             | 6356   | AF523985.1 |
| Acidobacteria   | Acidobacteria       | Acidobacteriales    | Acidobacteriaceae             | 6359   | AF529322.1 |
| Acidobacteria   | Acidobacteria       | Acidobacteriales    | Acidobacteriaceae             | 6366   | AJ292578.1 |
| Acidobacteria   | Acidobacteria       | Acidobacteriales    | Acidobacteriaceae             | 6368   | AF200698.1 |
| Acidobacteria   | Acidobacteria       | Acidobacteriales    | Acidobacteriaceae             | 6378   | D26171.1   |
| Acidobacteria   | Acidobacteria       | Acidobacteriales    | Acidobacteriaceae             | 6412   | AF047646.1 |
| Acidobacteria   | Acidobacteria       | Acidobacteriales    | Acidobacteriaceae             | 6423   | AF523979.1 |
| Acidobacteria   | Acidobacteria-6     | Unclassified        | Unclassified                  | 500    | Z95717.1   |
| Acidobacteria   | Acidobacteria-7     | Unclassified        | Unclassified                  | 588    | AJ009461.1 |
| Actinobacteria  | Actinobacteria      | Actinomycetales     | Unclassified                  | 1405   | X80744.1   |
| Actinobacteria  | Actinobacteria      | Rubrobacterales     | Rubrobacteraceae              | 1843   | AJ536866.1 |
| Bacteroidetes   | Sphingobacteria     | Sphingobacteriales  | Flexibacteraceae              | 6297   | AF502211.1 |
| BRC1            | Unclassified        | Unclassified        | Unclassified                  | 118    | AY218548.1 |
| Chloroflexi     | Anaerolineae        | Chloroflexi-1f      | Unclassified                  | 765    | AJ278167.1 |
| Chloroflexi     | Anaerolineae        | Unclassified        | Unclassified                  | 205    | AJ532729.1 |
| Chloroflexi     | Anaerolineae        | Unclassified        | Unclassified                  | 946    | AY216458.1 |
| Chloroflexi     | Dehalococcoidetes   | Unclassified        | Unclassified                  | 2339   | AJ519643.1 |
| Chloroflexi     | Unclassified        | Unclassified        | Unclassified                  | 2523   | AJ347055.1 |
| DSS1            | Unclassified        | Unclassified        | Unclassified                  | 38     | AJ306783.1 |
| Firmicutes      | Clostridia          | Clostridiales       | Lachnospiraceae               | 2931   | AB088994.1 |
| Firmicutes      | Clostridia          | Clostridiales       | Lachnospiraceae               | 4510   | AB089034.1 |
| Firmicutes      | Clostridia          | Clostridiales       | Peptococc/Acidaminococc       | 242    | AJ493052.1 |
| Firmicutes      | Clostridia          | Clostridiales       | Unclassified                  | 2324   |            |
| Firmicutes      | Clostridia          | Clostridiales       | Unclassified                  | 3476   |            |
| Lentisphaerae   | Unclassified        | Unclassified        | Unclassified                  | 10330  | AF507900.1 |
| Proteobacteria  | Alphaproteobacteria | Caulobacterales     | Caulobacteraceae              | 6781   | AB023784.1 |
| Proteobacteria  | Alphaproteobacteria | Caulobacterales     | Caulobacteraceae              | 6968   | AB021415.1 |
| Proteobacteria  | Deltaproteobacteria | Desulfovibrionales  | Desulfovibrionaceae           | 10016  | AB089110.1 |
| Proteobacteria  | Deltaproteobacteria | Syntrophobacterales | Syntrophobacteraceae          | 10021  | AJ519630.1 |
| Proteobacteria  | Gammaproteobacteria | Enterobacteriales   | Enterobacteriaceae            | 433    | AF523903.1 |
| SPAM            | Unclassified        | Unclassified        | Unclassified                  | 738    | AJ532725.1 |
| Spirochaetes    | Spirochaetes        | Spirochaetales      | Spirochaetaceae               | 6558   | AF166259.1 |
| Unclassified    | Unclassified        | Unclassified        | Unclassified                  | 6355   |            |
| Verrucomicrobia | Unclassified        | Unclassified        | Unclassified                  | 288    | U60012.1   |
| Verrucomicrobia | Verrucomicrobiae    | Verrucomicrobiales  | Verrucomicrobia subdivision 7 | 446    | AY114322.1 |
| Verrucomicrobia | Verrucomicrobiae    | Verrucomicrobiales  | Verrucomicrobia subdivision 5 | 530    | AY114334.1 |
| Verrucomicrobia | Verrucomicrobiae    | Verrucomicrobiales  | Verrucomicrobiaceae           | 1024   | AY244959.1 |
