# Supplementary material for: Characterization of Trapped Lignin-Degrading Microbes in Tropical Forest Soil
Source: PLoS One. 2011 Apr 29;6(4):e19306. doi: 10.1371/journal.pone.0019306 (PMC3084812; doi:10.1371/journal.pone.0019306)
Supplement: Table S2 — PhyloChip richness of taxa from the lignin-amended and unamended beads. (PDF) [file pone.0019306.s008.pdf]

Table S2. PhyloChip richness of taxa from the lignin-amended and unamended bugtraps.

|                       | T1     |           | T2     |           | T3     |           | T4     |           |
|-----------------------|--------|-----------|--------|-----------|--------|-----------|--------|-----------|
|                       | lignin | no lignin |
| Proteobacteria        | 131    | 71        | 291    | 365       | 322    | 248       | 46     | 92        |
| Firmicutes            | 12     | 3         | 27     | 30        | 39     | 53        | 3      | 5         |
| Acidobacteria         | 13     | 3         | 22     | 22        | 30     | 22        | 10     | 8         |
| Bacteroidetes         | 11     | 3         | 18     | 31        | 22     | 22        | 5      | 7         |
| Actinobacteria        | 11     | 1         | 19     | 17        | 30     | 34        | 1      | 1         |
| Verrucomicrobia       | 8      | 3         | 10     | 10        | 11     | 8         | 5      | 6         |
| Chloroflexi           | 4      | 1         | 8      | 12        | 15     | 13        | 1      | 4         |
| Unclassified          | 4      | 2         | 9      | 11        | 13     | 9         | 2      | 4         |
| Cyanobacteria         | 2      | 1         | 4      | 5         | 7      | 5         | 1      | 2         |
| Spirochaetes          | 1      | 0         | 3      | 4         | 6      | 4         | 1      | 1         |
| Synergistes           | 1      | 0         | 4      | 4         | 5      | 3         | 1      | 2         |
| Planctomycetes        | 1      | 0         | 2      | 5         | 5      | 4         | 0      | 2         |
| Gemmatimonadetes      | 1      | 0         | 3      | 4         | 5      | 4         | 0      | 1         |
| OP10                  | 1      | 0         | 2      | 2         | 3      | 1         | 0      | 0         |
| SPAM                  | 1      | 0         | 1      | 2         | 2      | 1         | 1      | 1         |
| Nitrospira            | 1      | 0         | 1      | 1         | 2      | 1         | 1      | 1         |
| marine group A        | 1      | 0         | 1      | 1         | 1      | 1         | 1      | 1         |
| Chlorobi              | 0      | 0         | 1      | 2         | 2      | 2         | 0      | 0         |
| Deinococcus-Thermus   | 0      | 0         | 1      | 2         | 2      | 1         | 0      | 0         |
| Lentisphaerae         | 0      | 0         | 1      | 1         | 2      | 2         | 0      | 0         |
| OP3                   | 0      | 0         | 1      | 1         | 2      | 1         | 0      | 1         |
| BRC1                  | 1      | 0         | 1      | 1         | 2      | 1         | 0      | 0         |
| Natronoanaerobium     | 1      | 0         | 1      | 1         | 2      | 2         | 0      | 0         |
| NC10                  | 0      | 0         | 1      | 1         | 2      | 1         | 0      | 0         |
| TM7                   | 0      | 0         | 1      | 2         | 2      | 1         | 0      | 0         |
| OP9/JS1               | 0      | 0         | 1      | 1         | 1      | 1         | 0      | 0         |
| WS3                   | 0      | 0         | 1      | 1         | 1      | 1         | 0      | 0         |
| Thermodesulfobacteria | 0      | 0         | 1      | 1         | 1      | 1         | 0      | 0         |
| Caldithrix            | 0      | 0         | 0      | 1         | 1      | 1         | 0      | 0         |
| AD3                   | 0      | 0         | 0      | 1         | 1      | 1         | 0      | 0         |
| LD1PA                 | 0      | 0         | 1      | 1         | 1      | 0         | 0      | 0         |
| DSS1                  | 0      | 0         | 1      | 0         | 1      | 0         | 0      | 0         |
| TM6                   | 0      | 0         | 1      | 0         | 0      | 1         | 0      | 0         |
| Chlamydiae            | 0      | 0         | 0      | 1         | 1      | 0         | 0      | 0         |
| OP8                   | 0      | 0         | 0      | 0         | 0      | 1         | 0      | 0         |
| Aquificae             | 0      | 0         | 0      | 0         | 0      | 0         | 0      | 0         |
